# Supplementary material
Source: PubMed Central journal article supplement (PMC3075756)
Supplement: pp.110.162750_1.pdf [file pp.110.162750_1.pdf]

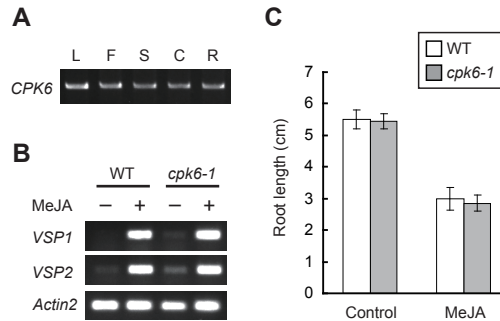

**Supplemental Figure S1.** Expression pattern of *CPK6* and MeJA responses other than stomatal closure in the *cpk6-1* mutant. A, RT-PCR analysis of *CPK6* mRNA expression pattern (L, rosette leaves; F, flower; S, stem; C, cauline leaves; R, root). B, Semi-quantitative RT-PCR analysis of MeJA (10  $\mu$ M)-induced expression of MeJA responsive genes, *VSP1* and *VSP2* in wild-type (left) and *cpk6-1* leaves (right). *ACTIN2* was used as an internal standard. C, MeJA (10  $\mu$ M) inhibition of root growth in wild-type (white bars) and *cpk6-1* plants (gray bars).

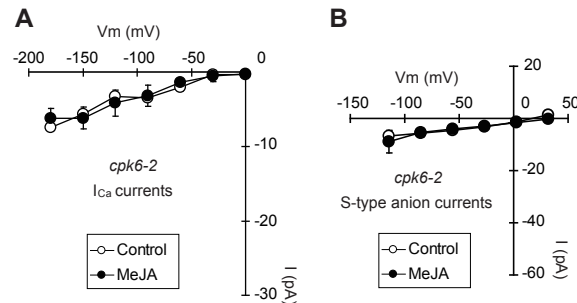

**Supplemental Figure S2.** MeJA activation of I<sub>Ca</sub> channels and S-type anion channels in *cpk6-2* GCPs. A, Current-voltage relationships for I<sub>Ca</sub> currents in *cpk6-2* GCPs (n = 3, white circles, control; black circles, 10 μM MeJA). A ramp voltage protocol from +20 to -180 mV (holding potential: 0 mV; ramp speed: 200 mV/sec) was used. GCPs were treated with 10 μM MeJA for 1 h before recordings. After making the whole-cell configuration, I<sub>Ca</sub> currents were recorded 16 times for each GCP. B, Steady-state current-voltage relationships for S-type anion currents in *cpk6-2* GCPs (n = 3, white circles, control; black circles, 10 μM MeJA). The voltage protocol was stepped-up from +35 mV to -115 mV in 30-mV decrements (holding potential: +30 mV). GCPs were treated with 10 μM MeJA for 2 h before recordings. Note that [Ca<sup>2+</sup>]<sub>cyt</sub> was buffered to 2 μM.

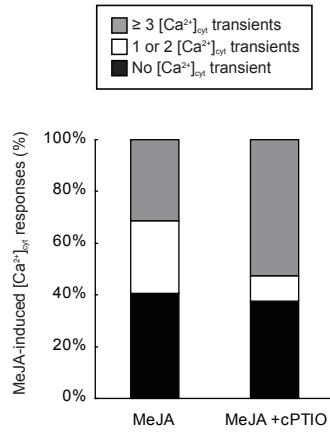

**Supplemental Figure S3.** Effect of an NO scavenger, cPTIO on MeJA-induced  $[Ca^{2+}]_{cyt}$  increments in WT guard cells. Stack column representation of the number of MeJA-induced transient  $[Ca^{2+}]_{cyt}$  increments in WT guard cells pretreated without cPTIO (n = 32) and with 100  $\mu$ M cPTIO (n = 40). Epidermal peels were pretreated with cPTIO 5 min before MeJA application.
